# Supplementary material for: Counting the Savings: Impact of Georgia's Drug Policy Interventions on Households
Source: Research Square preprint supplement (doi:10.21203/rs.3.rs-5981851/v1), 2025-02-14
Supplement: Supplementary file 1 [file ae8a807b3b875d93d5e37932.docx]

Figure 1 Trends in Median Household Drug Expenditure Over Time with Intervention Points


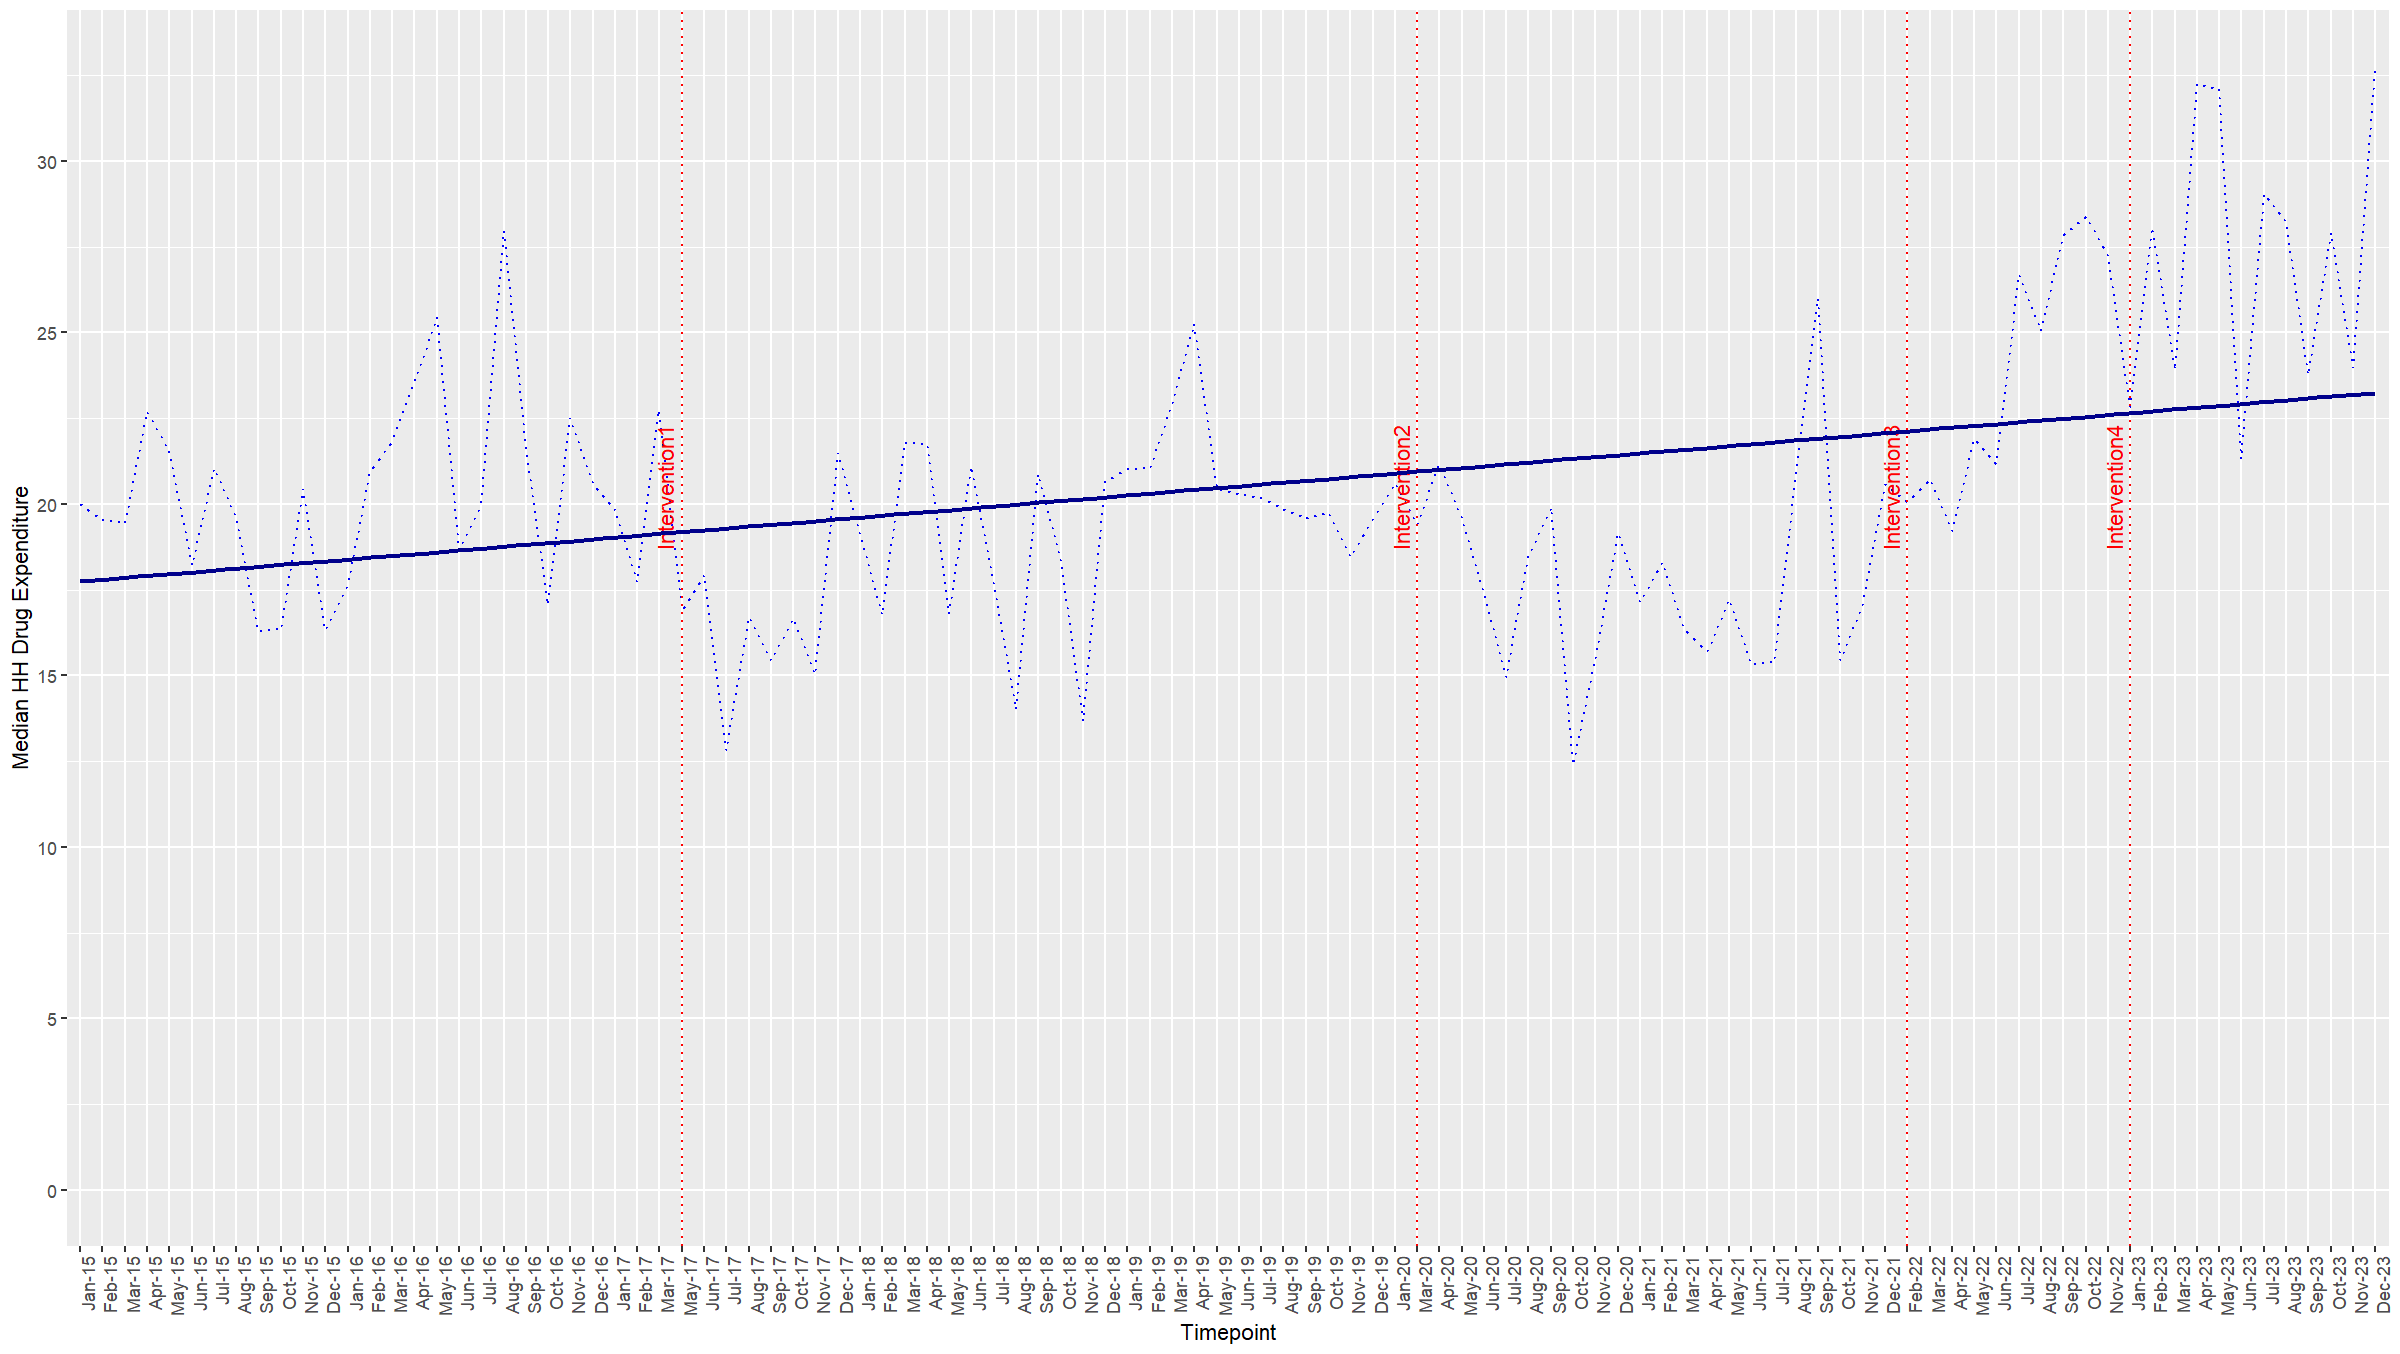


Figure 2 Visual inspection of seasonality in inflation adjusted median monthly drug expenditure (decomposition with 4-month frequency)


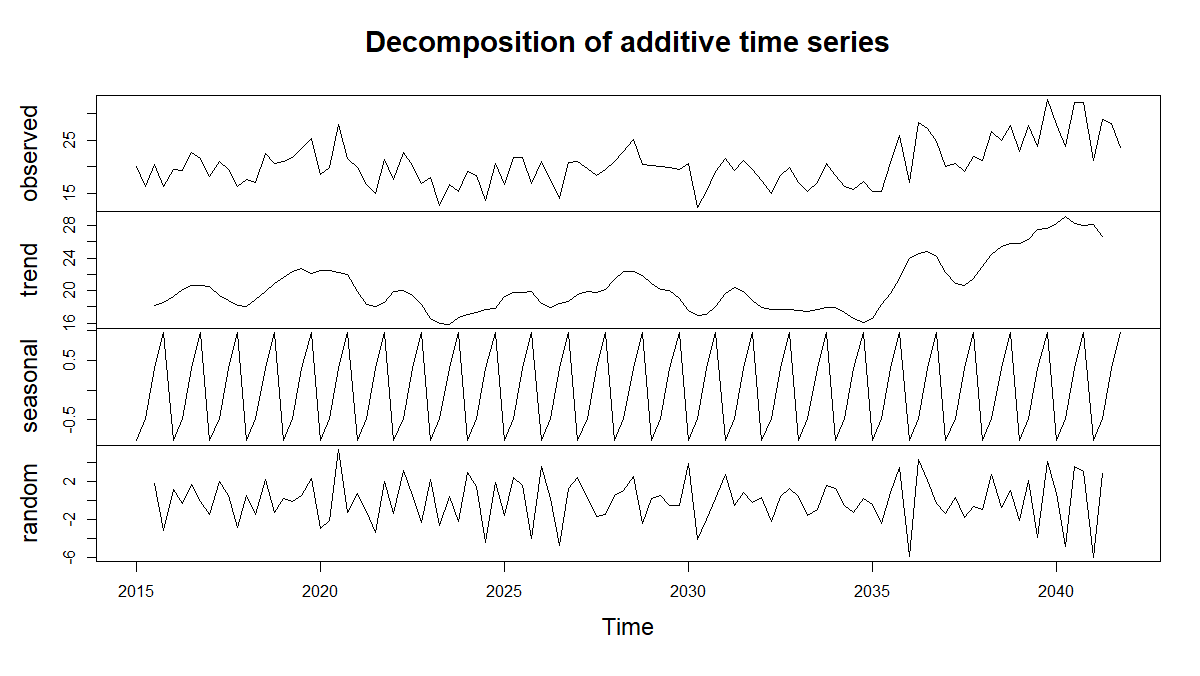


Figure 3 Autocorrelation Function (ACF) Plot of Residuals


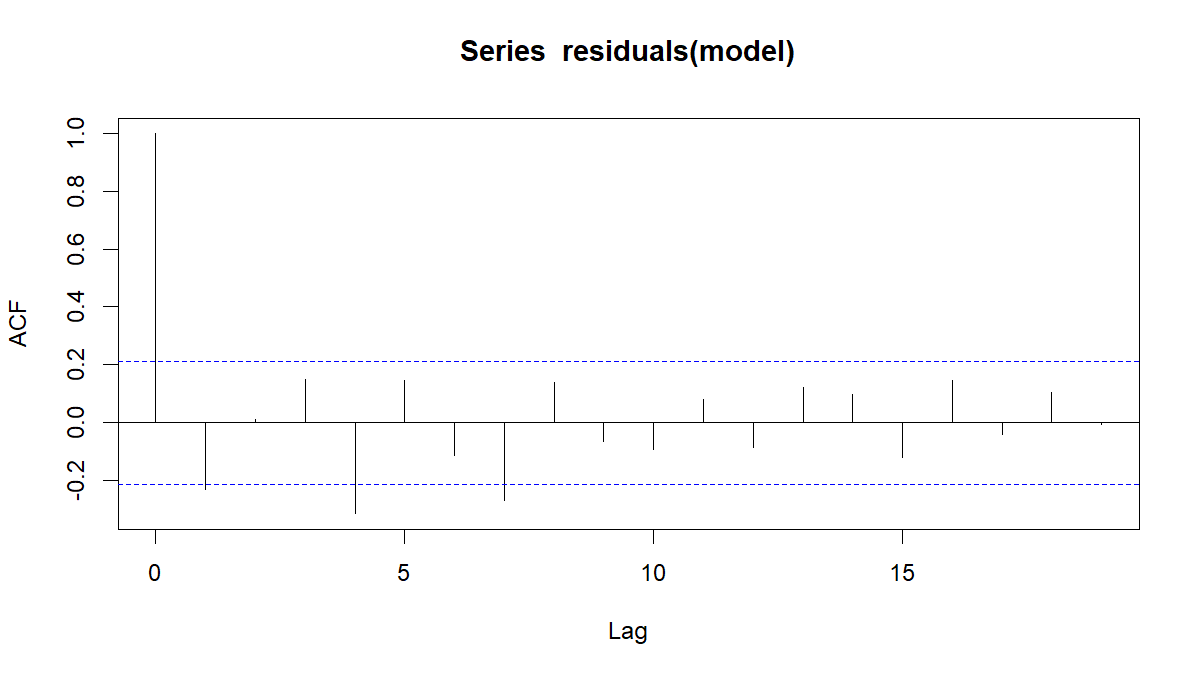


Durbin Watson static = 2.442 (p- value = 0.89)

Figure 4 Residuals vs. Fitted Values Plot for Model Diagnostics


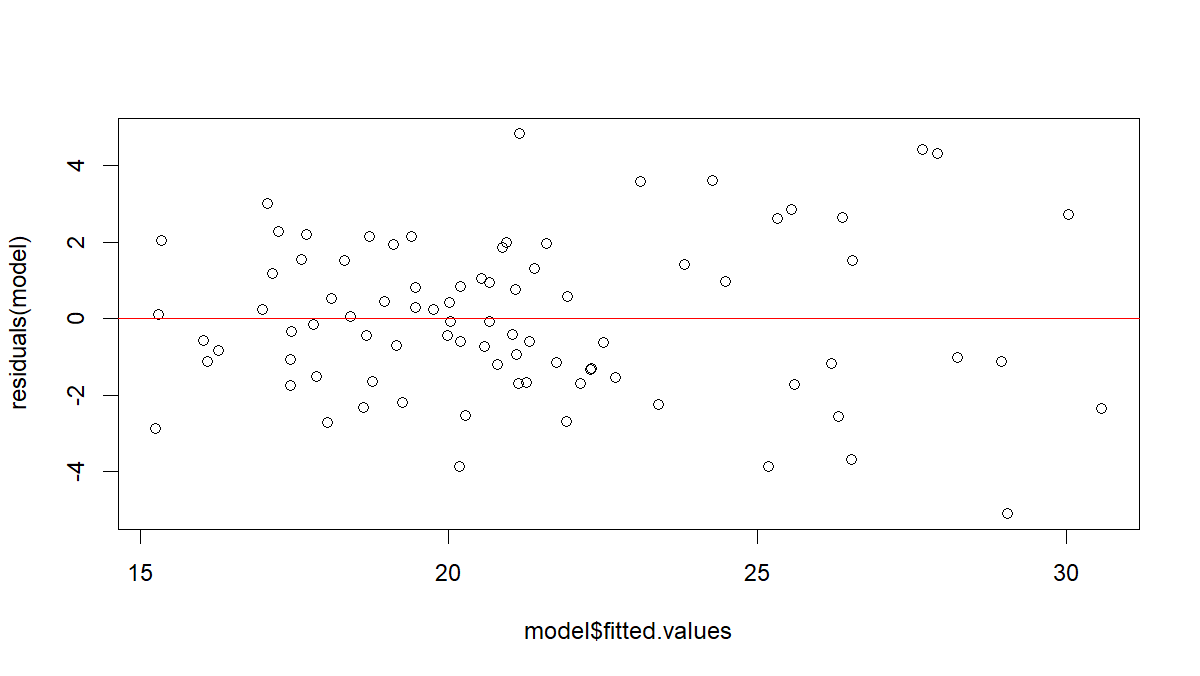


Table 1 Model fit statistics

| **Metric** | **Value** |
| --- | --- |
| R-squared | 0.762 |
| AIC | 408.89 |
| BIC | 467.52 |
